# Supplementary material
Source: PubMed Central journal article supplement (PMC2801277)

**S1. MDH2 is associated with actin patches in wild type cells.** Wild type cells expressing MDH2-GFP were transferred to media containing fresh glucose for 0-60 min. MDH2 and actin were visualized via fluorescence microscopy.

WT

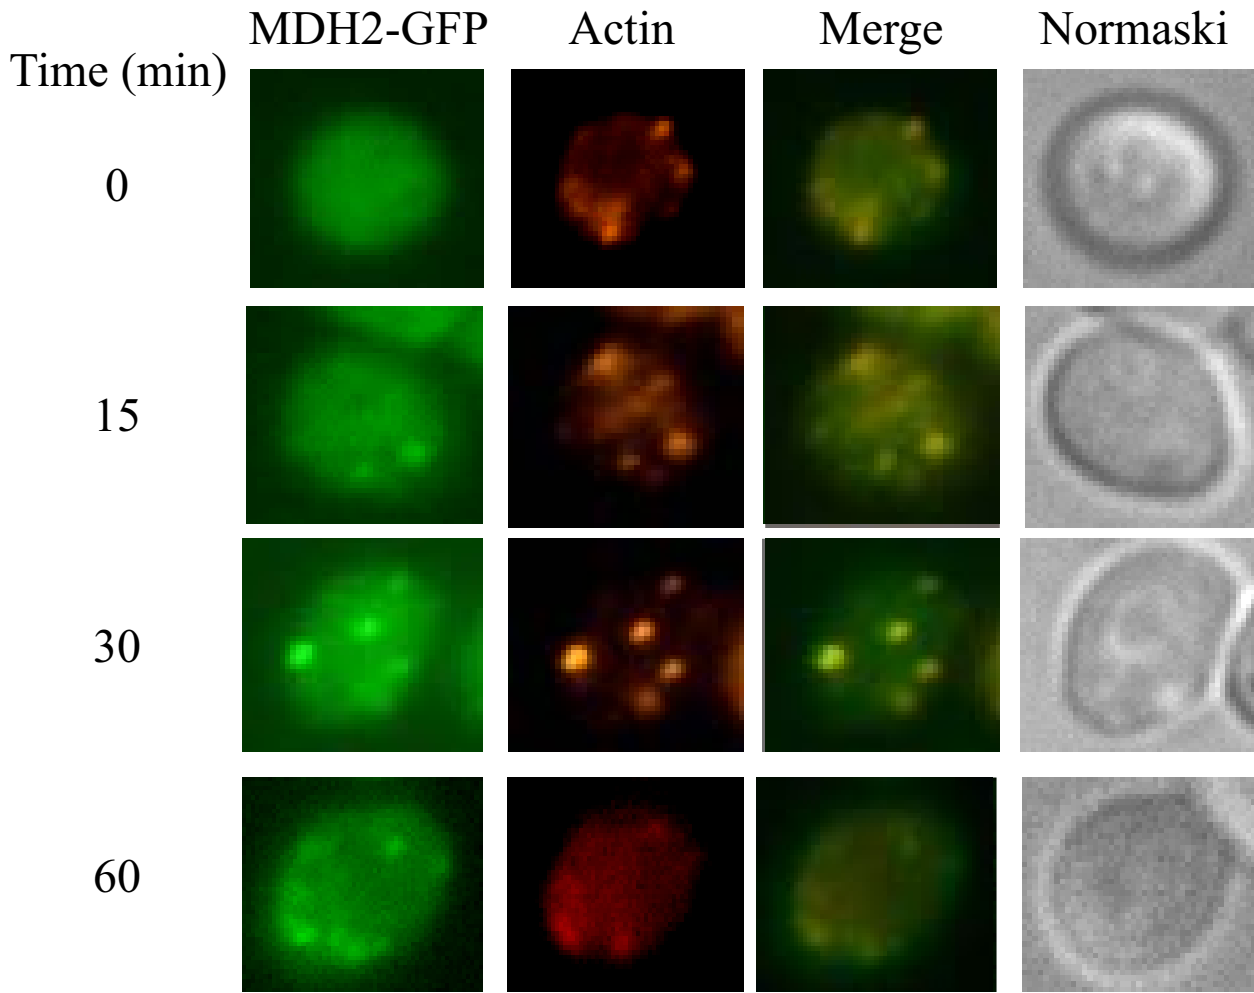

Supplement: supp_M109.028241_jbc.M109.028241-1.pdf [file supp_M109.028241_jbc.M109.028241-1.pdf]
